# Supplementary material for: A Systematic Review of Carcinogenic Outcomes and Potential Mechanisms from Exposure to 2,4-D and MCPA in the Environment
Source: Hindawi journal article supplement (doi:10.1155/2013/371610), 2013-01-01
Supplement: f1 [file 371610.f1.pdf]

## Schematic View of a GAP

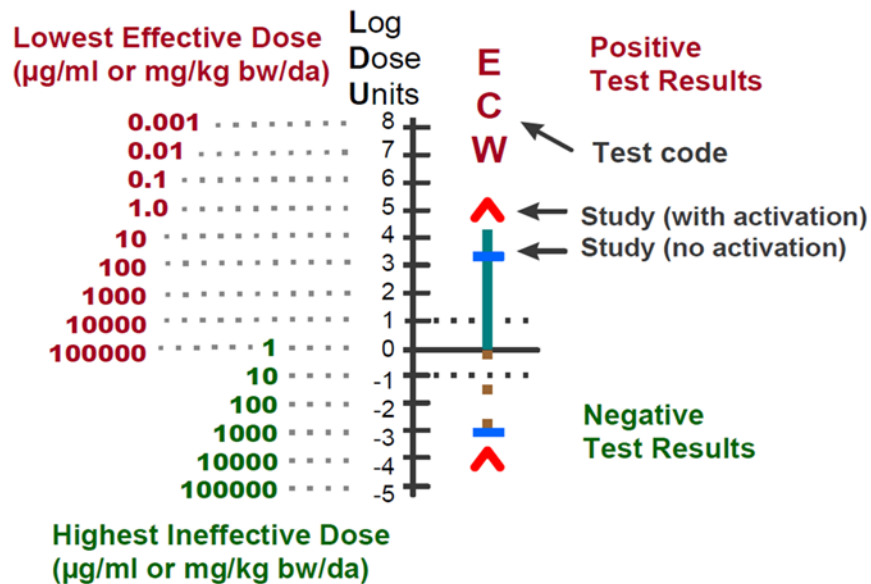

In the schematic diagram of a GAP above, four studies (two positive; two negative) are illustrated for an example short-term test, ECW. Studies using exogenous metabolic activation are indicated by the carets (^) and those studies done without exogenous activation are marked by the horizontal bars (-). A solid vertical profile line is drawn to the mean LDU of the majority call (positive or negative). A dashed vertical line is drawn to the extreme of the conflicting test results. Note in cases where there are an equal number of positive and negative studies, as illustrated here, the overall call is positive.

GAPs are produced with tests in phylogenetic order and with tests in endpoint order (see below for 2,4-D).

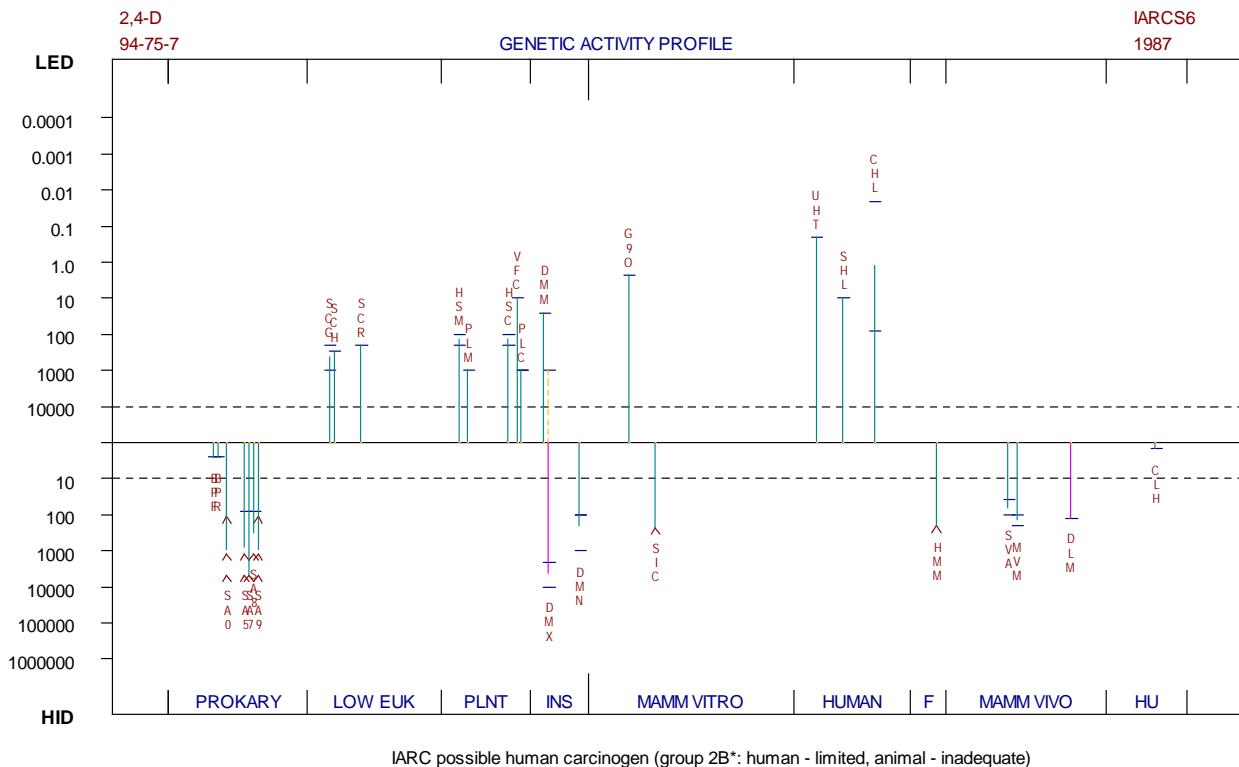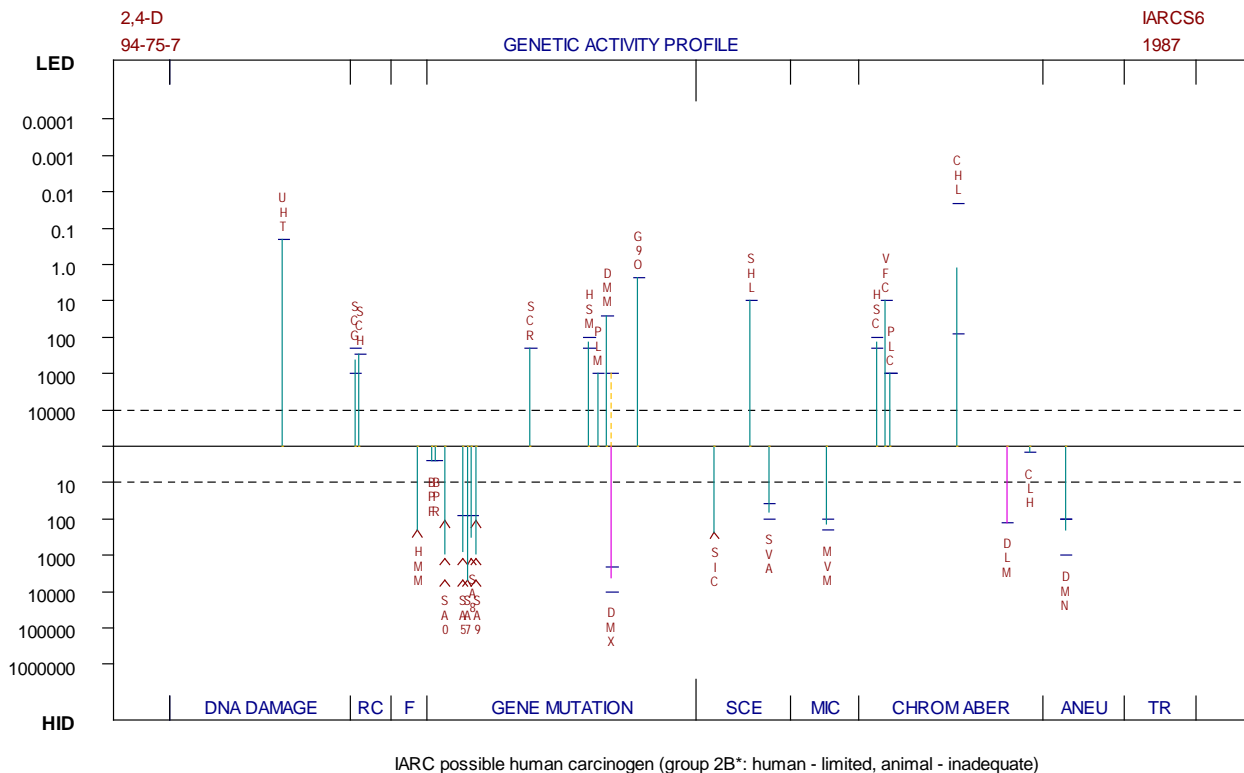

TEST END- RESULTS DOSE REF ID REFERENCE

CODE POINT -MA +MA (LED or HID) NUMBER

|    |     |   |     |   |           |       |                           |
|----|-----|---|-----|---|-----------|-------|---------------------------|
| 1  | UHT | D | +   | + | 0.2000    | 2756  | Ahmed et al. (1977)       |
| 2  | SCG | R | +   | 0 | 200.0000  | 3566  | Zetterberg et al. (1977)  |
| 3  | SCG | R | (+) | 0 | 1000.0000 | 2339  | Siebert & Lemperle (1974) |
| 4  | SCH | R | +   | 0 | 300.0000  | 3566  | Zetterberg et al. (1977)  |
| 5  | HMM | H | 0   | - | 200.0000  | 3566  | Zetterberg et al. (1977)  |
| 6  | BPF | G | -   | 0 | 2.5000    | 10066 | Andersen et al. (1972)    |
| 7  | BPR | G | -   | 0 | 2.5000    | 10066 | Andersen et al. (1972)    |
| 8  | SA0 | G | -   | - | 5000.0000 | 3718  | Mortelmans et al. (1984)  |
| 9  | SA0 | G | -   | - | 110.0000  | 2308  | Nishimura et al. (1982)   |
| 10 | SA0 | G | 0   | - | 1250.0000 | 47    | Anderson & Styles (1978)  |
| 11 | SA5 | G | -   | - | 5000.0000 | 3718  | Mortelmans et al. (1984)  |
| 12 | SA5 | G | -   | 0 | 80.0000   | 3566  | Zetterberg et al. (1977)  |
| 13 | SA5 | G | 0   | - | 1250.0000 | 47    | Anderson & Styles (1978)  |
| 14 | SA7 | G | -   | - | 5000.0000 | 3718  | Mortelmans et al. (1984)  |
| 15 | SA8 | G | -   | 0 | 80.0000   | 3566  | Zetterberg et al. (1977)  |
| 16 | SA8 | G | 0   | - | 1250.0000 | 47    | Anderson & Styles (1978)  |
| 17 | SA9 | G | -   | - | 5000.0000 | 3718  | Mortelmans et al. (1984)  |
| 18 | SA9 | G | -   | - | 110.0000  | 2308  | Nishimura et al. (1982)   |
| 19 | SA9 | G | 0   | - | 1250.0000 | 47    | Anderson & Styles (1978)  |
| 20 | SAS | G | -   | 0 | 0.0000    | 10066 | Andersen et al. (1972)    |

|    |     |   |     |   |            |       |                             |
|----|-----|---|-----|---|------------|-------|-----------------------------|
| 21 | SCR | G | +   | 0 | 200.0000   | 3565  | Zetterberg (1978)           |
| 22 | HSM | G | +   | 0 | 200.0000   | 2335  | Mohandas & Grant (1972)     |
| 23 | HSM | G | (+) | 0 | 100.0000   | 2282  | Khalatkar & Bhargava (1982) |
| 24 | PLM | G | +   | 0 | 1000.0000  | 2191  | Logvinenko & Morgun (1978)  |
| 25 | DMM | G | +   | 0 | 25.0000    | 3564  | Rasmuson & Svahlin (1978)   |
| 26 | DMX | G | -   | 0 | 10000.0000 | 3719  | Zimmering et al. (1985)     |
| 27 | DMX | G | +   | 0 | 1000.0000  | 2205  | Magnusson et al. (1977)     |
| 28 | DMX | G | -   | 0 | 1989.0000  | 2123  | Vogel & Chandler (1974)     |
| 29 | G9O | G | +   | 0 | 2.2000     | 2213  | Ahmed et al. (1977)         |
| 30 | SIC | S | -   | - | 221.0000   | 2052  | Linnainmaa (1984)           |
| 31 | SHL | S | +   | 0 | 10.0000    | 10078 | Korte & Jalal (1982)        |
| 32 | SVA | S | (-) | 0 | 40.0000    | 3716  | Lamb IV et al. (1981)       |
| 33 | SVA | S | -   | 0 | 100.0000   | 2052  | Linnainmaa (1984)           |
| 34 | SLH | S | (+) | 0 | 0.0000     | 3717  | Crossen et al. (1978)       |
| 35 | SLH | S | -   | 0 | 0.0000     | 10076 | Linnainmaa (1983)           |
| 36 | MVM | M | -   | 0 | 100.0000   | 2383  | Jenssen & Renberg (1976)    |
| 37 | MVM | M | -   | 0 | 200.0000   | 3563  | Seiler (1978)               |
| 38 | HSC | C | +   | 0 | 200.0000   | 2202  | Singh et al. (1977)         |
| 39 | HSC | C | (+) | 0 | 100.0000   | 2282  | Khalatkar & Bhargava (1982) |
| 40 | VFC | C | +   | 0 | 10.0000    | 2324  | Prasad & Das (1977)         |
| 41 | PLC | C | +   | 0 | 1000.0000  | 2222  | Al-najjar & Soliman (1982)  |
| 42 | PLC | C | +   | 0 | 1000.0000  | 2191  | Logvinenko & Morgun (1978)  |
| 43 | CHL | C | +   | 0 | 77.3500    | 3567  | Mustonen et al. (1986)      |
| 44 | CHL | C | +   | 0 | 0.0200     | 10080 | Pilinskaya (1974)           |
| 45 | DLM | C | -   | 0 | 125.0000   | 414   | Epstein et al. (1972)       |

|    |     |   |     |   |           |      |                          |
|----|-----|---|-----|---|-----------|------|--------------------------|
| 46 | CLH | C | (-) | 0 | 0.0000    | 3712 | Hogstedt et al. (1980)   |
| 47 | CLH | C | -   | 0 | 1.5600    | 3567 | Mustonen et al. (1986)   |
| 48 | DMN | A | -   | 0 | 1000.0000 | 2300 | Woodruff et al. (1983)   |
| 49 | DMN | A | -   | 0 | 100.0000  | 2205 | Magnusson et al. (1977)  |
| 50 | DMN | A | -   | 0 | 100.0000  | 2001 | Ramel & Magnusson (1979) |
| 51 | ICR |   | +   | 0 | 150.0000  | 3736 | Rubinstein et al. (1984) |

IARC possible human carcinogen (group 2B\*: human - limited, animal - inadequate)

#### Footnotes:

Results are recorded in separate data columns for in vitro studies without exogenous metabolic activation (-MA) and/or exogenous metabolic activation (+MA).

Results from in vivo studies are recorded in the -MA column.

Codes used for test results are defined as: +, positive; (+), weakly positive; -, negative; ?, equivocal; 0, not tested

Doses are either the lowest effective dose (LED) or highest ineffective dose (HID).

Doses from in vitro studies are expressed as µg/ml, and the in vivo values are calculated to be mg/kg body weight per day.

For an agent in an IARC Monographs project, the IARC Working Group determined the degree of evidence of carcinogenicity in humans and animals, and made an overall evaluation of carcinogenic risk to humans. The evaluation is shown immediately above these footnotes for the IARC data. An Asterisk(\*) marked after the IARC carcinogenicity evaluation indicates that the evaluation applies to the group of chemicals as a whole and not to any specific chemical within that group.

## Description of Test Codes in Endpoint order

### DNA damage

UHT = Unscheduled DNA synthesis, transformed human cells in vitro

### Recombination

SCG = *Saccharomyces cerevisiae*, gene conversion

SCH = *S. cerevisiae*, homozygosis by recombination or gene conversion

### Body fluid and host mediated assays

HMM = Host mediated assay, microbial cells in animal hosts

### Gene mutation

BPF = Bacteriophage, forward mutation

BPR = Bacteriophage, reverse mutation

SA0 = *Salmonella typhimurium* TA100, reverse mutation

SA5 = *Salmonella typhimurium* TA1535, reverse mutation

SA7 = *Salmonella typhimurium* TA1537, reverse mutation

SA8 = *Salmonella typhimurium* TA1538, reverse mutation

SA9 = *Salmonella typhimurium* TA98, reverse mutation

SAS = *Salmonella typhimurium* (other misc. strains), reverse mutation

SCR = *Saccharomyces cerevisiae*, reverse mutation

HSM = *Hordeum* species, mutation

PLM = Plants (other), mutation

DMM = *Drosophila melanogaster*, somatic mutation (and recombination)

DMX = *Drosophila melanogaster*, sex-linked recessive lethal mutation

G9O = Gene mutation, Chinese hamster lung V-79 cells in vitro, ouabain

### Sister chromatid exchange

SIC = Sister chromatid exchange, Chinese hamster cells in vitro

SHL = Sister chromatid exchange, human lymphocytes in vitro

SVA = Sister chromatid exchange, animal cells in vivo

SLH = Sister chromatid exchange, human lymphocytes in vivo

#### Micronuclei

MVM = Micronucleus test, mice in vivo

#### Chromosome aberration

HSC = Hordeum species, chromosomal aberrations

VFC = Vicia faba, chromosomal aberrations

PLC = Plants (other), chromosomal aberrations

CHL = Chromosomal aberrations, human lymphocytes in vitro

DLM = Dominant lethal test, mice

CLH = Chromosomal aberrations, human lymphocytes in vivo

#### Aneuploidy

DMN = Drosophila melanogaster, aneuploidy

#### Alternative testcodes (not included in profiles)

ICR = Inhibition of intercellular communication, rodent in vitro

#### Endpoint Codes

A, Aneuploidy; C, Chromosome aberrations; D, DNA damage; F, Body fluids; G, Gene Mutation

H, Host-mediated assay; M, Micronucleus; R, Recombination; S, SCE; T, Cell transformation

Ahmed, F. E., Hart, R. W., & Lewis, N. J. (1977) Pesticide induced DNA damage and its repair in cultured human cells. *Mutat Res*, 42, 161-174

(Ref. ID: 2756)

Ahmed, F. E., Lewis, N. J., & Hart, R. W. (1977) Pesticide induced ouabain resistant mutants in Chinese hamster V79 cells. *Chem Biol Interact*, 19, 369-374

(Ref. ID: 2213)

Al-najjar, N. R. & Soliman, A. S. (1982) Cytological effects of herbicides. I. Effect of 2,4-d, and 2,4,5-T on meiotic cells of wheat and two related species. *Cytologia*, 47, 53-61

(Ref. ID: 2222)

Andersen, K. J., Leighty, E. G., & Takahashi, M. T. (1972) Evaluation of herbicides for possible mutagenic properties. *J Agric Fd Chem*, 20, 649-656

(Ref. ID: 10066)

Anderson, D. & Styles, J. A. (1978) An evaluation of six short-term tests for detecting organic chemical carcinogens. Appendix 2. The bacterial mutation test. *Br J Cancer*, 37, 924-930

(Ref. ID: 47)

Crossen, P. E., Morgan, W. F., Horan, J. J., & Stewart, J. (1978) Cytogenetic studies of pesticide and herbicide sprayers. *N.Z. Med. J.*, 88, 192-195

(Ref. ID: 3717)

Epstein, S. S., Arnold, E., Andrea, J., Bass, W., & Bishop, Y. (1972) Detection of chemical mutagens by the dominant lethal assay in the mouse. *Toxicol Appl Pharmacol*, 23, 288-325

(Ref. ID: 414)

Hogstedt, B., Kolnig, A., Mitelman, F., & Skerfving, S. (1980) Cytogenetic study of pesticides in agricultural work. *Hereditas*, 92, 177-178

(Ref. ID: 3712)



Jenssen, D. & Renberg, L. (1976) Distribution and cytogenetic test of 2,4-D and 2,4,5-T phenoxyacetic acids in mouse blood tissues. *Chem Biol Interact*, 14, 291-299

(Ref. ID: 2383)

Khalatkar, A. S. & Bhargava, Y. R. (1982) 2,4-dichlorophenoxyacetic acid - a new environmental mutagen. *Mutat Res*, 103, 111-114

(Ref. ID: 2282)

Korte, C. & Jalal, S. M. (1982) 2,4-D induced clastogenicity and elevated rates of sister chromatid exchanges in cultured human lymphocytes. *J Hered*, 73, 224-226

(Ref. ID: 10078)

Lamb IV, J. C., Marks, T. A., Gladen, B. C., Allen, J. W., & Moore, J. A. (1981) Male fertility, sister chromatid exchange, and germ cell toxicity following exposure to mixtures of chlorinated phenoxy acids containing 2,3,7,8-tetrachlorodibenzo-p-dioxin. *J Toxicol Environ Health*, 8, 825-834

(Ref. ID: 3716)

Linnainmaa, K. (1983) Sister chromatid exchanges among workers occupationally exposed to phenoxy acid herbicides 2,4-D and MCPA. *Teratogenesis Carcinog Mutagen*, 3, 269-279

(Ref. ID: 10076)

Linnainmaa, K. (1984) Induction of sister chromatid exchanges by the peroxisome proliferators 2,4-D, MCPA, and clofibrate in vivo and in vitro. *Carcinogenesis*, 5, 703-707

(Ref. ID: 2052)

Logvinenko, V. F. & Morgun, V. V. (1978) Study of the mutagenic action of certain pesticides on spring Durum wheat. *Cytol Genet*, 12, 12-16

(Ref. ID: 2191)

Magnusson, J., Ramel, C., & Eriksson, A. (1977) Mutagenic effects of chlorinated phenoxyacetic acids in *Drosophila melanogaster*. *Hereditas*, 87, 121-123

(Ref. ID: 2205)

Mohandas, T. & Grant, W. F. (1972) Cytogenetic effects of 2,4-D and amitrole in relation to nuclear volume and DNA content in some higher plants. *Can. J. Genet. Cytol.*, 14, 773-783

(Ref. ID: 2335)

Mortelmans, K., Haworth, S., Speck, W., & Zeiger, E. (1984) Mutagenicity testing of agent orange components and related chemicals. *Toxicol Appl Pharmacol*, 75, 137-146

(Ref. ID: 3718)

Mustonen, R., Kangas, J., Vuojolahti, P., & Linnainmaa, K. (1986) Effects of phenoxyacetic acids on the induction of chromosome aberrations in vitro and in vivo. *Mutagenesis*, 1, 241-245

(Ref. ID: 3567)

Nishimura, N., Nishimura, H., & Oshima, H. (1982) Survey on mutagenicity of pesticides by the Salmonella-microsome test. *Aichi Ika Daig Igak Zass*, 10, 305-312

(Ref. ID: 2308)

Pilinskaya, M. A. (1974) Cytogenetic effect of the herbicide 2,4-D on human and animal chromosomes. *Cytol Genet*, 8, 6-10

(Ref. ID: 10080)

Prasad, G. & Das, K. (1977) Effects of some growth substances on mitosis. *Cytologia*, 42, 323-329

(Ref. ID: 2324)

Ramel, C. & Magnusson, J. (1979) Chemical induction of nondisjunction in *Drosophila*. *Environ Health Perspect*, 31, 59-66

(Ref. ID: 2001)

Rasmuson, B. & Svahlin, H. (1978) Mutagenicity tests of 2,4-dichlorophenoxyacetic acid and 2,4,5-trichlorophenoxyacetic acid in genetically stable and unstable strains of *Drosophila melanogaster*. *Ecol. Bull. (Stockholm)*, 27, 190-192

(Ref. ID: 3564)

Rubinstein, C., Jone, C., Trosko, J. E., & Chang, C. (1984) Inhibition of intercellular communication in cultures of Chinese hamster V79 cells by 2,4-dichlorophenoxyacetic acid and 2,4,5-trichlorophenoxyacetic acid. *Fundam Appl Toxicol*, 4, 731-739

(Ref. ID: 3736)

Seiler, J. P. (1978) The genetic toxicology of phenoxy acids other than 2,4,5-T. *Mutat Res*, 55, 197-226

(Ref. ID: 3563)

Siebert, D. & Lemperle, E. (1974) Genetic effects of herbicides: induction of mitotic gene conversion in *Saccharomyces cerevisiae*. *Mutat Res*, 22, 111-120

(Ref. ID: 2339)

Singh, B. D., Singh, Y., Singh, R. B., Singh, V. P., Singh, R. M., & Bhatnagar, P. S. (1977) Cytogenetic effects of seed treatment with IAA, NAA and 2,4-d in barley *Hordeum vulgare* L. *Indian J Exp Biol*, 15, 1105-1108

(Ref. ID: 2202)

Vogel, E. & Chandler, J. L. R. (1974) Mutagenicity testing of cyclamate and some pesticides in *Drosophila melanogaster*. *Experientia*, 30, 621-623

(Ref. ID: 2123)

Woodruff, R. C., Phillips, J. P., & Irwin, D. (1983) Pesticide-induced complete and partial chromosome loss in screens with repair-defective females of *Drosophila melanogaster*. *Environ Mutagen*, 5, 835-846

(Ref. ID: 2300)

Zetterberg, G. (1978) Genetic effects of phenoxy acids on microorganisms. In: Ramel, C. (Ed.), *Chlorinated Phenoxy Acids and Their Dioxins*. *Ecol. Bull. (Stockholm)*, 27, 193-204

(Ref. ID: 3565)

Zetterberg, G., Busk, L., Elovson, R., Starec-Nordenhammar, I., & Rytman, H. (1977) The influence of pH on the effects of 2,4-D (2,4-dichlorophenoxyacetic acid Na salt) on *Saccharomyces cerevisiae* and *Salmonella typhimurium*. *Mutat Res*, 42, 3-18

(Ref. ID: 3566)

Zimmering, S., Mason, J. M., Valencia, R., & Woodruff, R. C. (1985) Chemical mutagenesis testing in *Drosophila* II. Results of 20 coded compounds tested for the National Toxicology Program. *Environ Mutagen*, 7, 87-100

(Ref. ID: 3719)
